# Supplementary material for: Integration of mate pair sequences to improve shotgun assemblies of flow-sorted chromosome arms of hexaploid wheat
Source: PubMed Central journal article supplement (PMC3622640; doi:10.1186/1471-2164-14-222), 2013-04-04
Supplement: 1471-2164-14-222-S1.pdf [file 1471-2164-14-222-S1.pdf]

### *Assembly of 7BL BAC clones*

DNA from 50 BACs belonging to 7BL (TaaCsp7BLhA, <http://olomouc.ueb.cas.cz/dna-libraries/cereals>) was isolated and sequenced on Illumina HiSeq2000. BAC-specific paired-end reads with 500bp insert size were cleaned by removing low quality, contamination and PCR duplications reads. Assembly and paired-end read scaffolding was carried out independently for each BAC clone with SOAPdenovo v1.06. Assemblies of BAC were optimized by testing various *k-mer* sizes (33-63) and selecting the assembly with the largest N50.
