# Supplementary material for: Integration of mate pair sequences to improve shotgun assemblies of flow-sorted chromosome arms of hexaploid wheat
Source: PubMed Central journal article supplement (PMC3622640; doi:10.1186/1471-2164-14-222), 2013-04-04

7BS PE insert size distribution

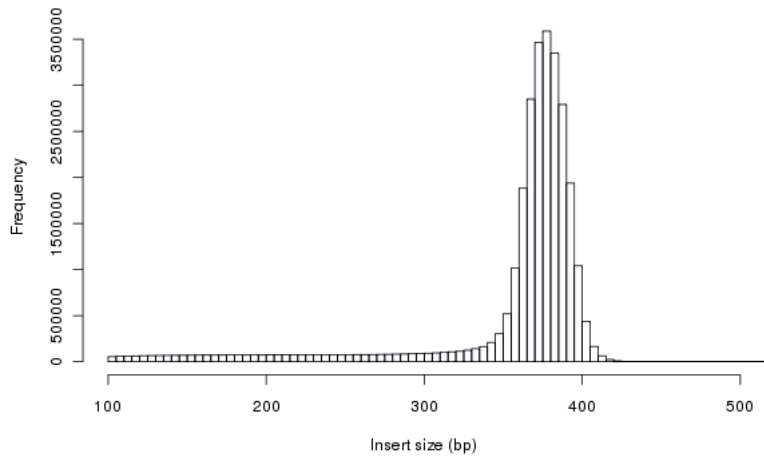

7BL PE insert size distribution

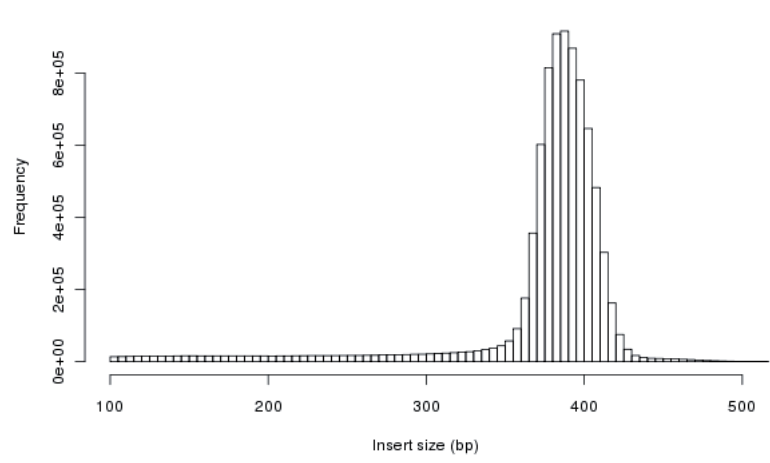

Supplement: 1471-2164-14-222-S3.pdf [file 1471-2164-14-222-S3.pdf]
